# Supplementary material for: Investigating the interaction mechanism of fluorescent whitening agents to human serum albumin using saturation transfer difference-NMR, multi-spectroscopy, and docking studies
Source: Royal Society of Chemistry journal article supplement (doi:10.1039/c7ra04008c), 2017-01-01
Supplement: c7ra04008c1.pdf [file c7ra04008c1.pdf]

## **Electronic supplementary information**

### **Investigating the interaction mechanism of fluorescent whitening agents to human serum albumin using saturation transfer difference-NMR, multi-spectroscopy, and docking studies**

**Ludan Zhao<sup>a</sup>, Jiuyang Liu<sup>b</sup>, Ronghui Guo<sup>a\*</sup>, Qiaomei Sun<sup>c</sup>, Hongqin Yang<sup>c</sup> and Hui Li<sup>c</sup>**

<sup>a</sup> College of Light Industry, Textile and Food Engineering, Sichuan University, Chengdu 610065, China. E-mail: ronghuiguo214@126.com. Tel: +86 28 65405420. Fax: + 86 28 85405423

<sup>b</sup> School of Life Sciences, University of Science and Technology of China, Hefei 230026, Anhui, China

<sup>c</sup> College of Chemical Engineering, Sichuan University, Chengdu 610065, Sichuan, China

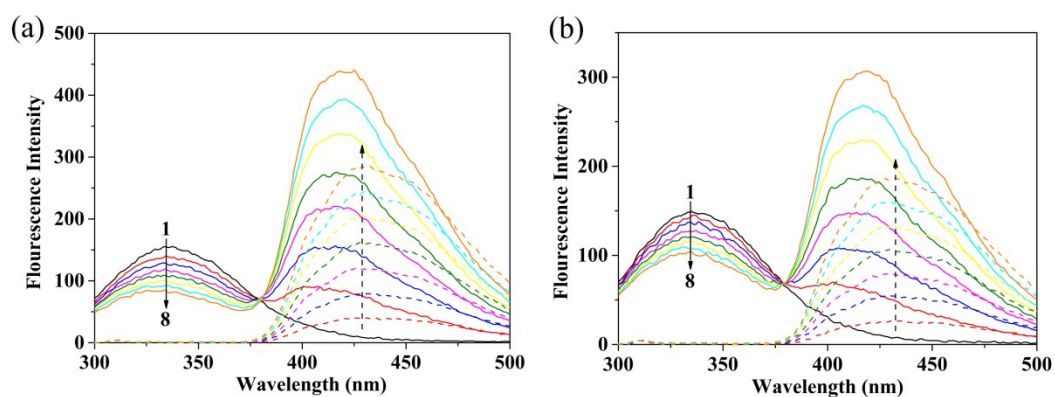

**Fig. S1** Fluorescence emission spectra (the solid line) of HSA with different content CBS (a) and CBS-X (b) additions. HSA is constant at 2  $\mu\text{M}$  and CBS and CBS-X varies from 0 to 1.4  $\mu\text{M}$  with gradient growth of 2.0  $\mu\text{M}$  (Peaks from 1 to 8). Fluorescence emission spectra (the dotted line) of CBS (a) and CBS-X (b), CBS and CBS-X vary from 0.2 to 1.4  $\mu\text{M}$  with gradient growth of 2.0  $\mu\text{M}$  (Peaks from bottom to top). The excitation wavelength and slit widths of excitation and emission were set at 280, 5 and 10 nm, respectively. T=298K.
